# Supplementary material for: Changes in arterial blood pressure caused by long-term administration of grape seed proanthocyanidins in rats with established hypertension
Source: Royal Society of Chemistry journal article supplement (doi:10.1039/d0fo00981d), 2020-01-01
Supplement: d0fo00981d1.pdf [file d0fo00981d1.pdf]

**Supplementary table 1.** Main phenolic compounds (flavanols and phenolic acids) of the grape seed polyphenol extract (GSPE) used in this study, analysed by HPLC-MS/MS. Extracted from Margalef et al. 2016 (15).

| <b>Compound</b>               | <b>Concentration<br/>(mg/g)</b> |
|-------------------------------|---------------------------------|
| Gallic acid                   | 31.07 ± 0.08                    |
| Protocatechuic acid           | 1.34 ± 0.02                     |
| Vanillic acid                 | 0.77 ± 0.04                     |
| PA dimer B2                   | 33.24 ± 1.39                    |
| PA dimer B11                  | 88.80 ± 3.46                    |
| PA dimer B31                  | 46.09 ± 2.07                    |
| Catechin                      | 121.32 ± 3.41                   |
| Epicatechin                   | 93.44 ± 4.27                    |
| Dimer gallate <sup>1</sup>    | 8.86 ± 0.14                     |
| Epicatechin gallate           | 21.24 ± 1.08                    |
| Epigallocatechin gallate      | 0.03 ± 0.00                     |
| Epigallocatechin <sup>2</sup> | 0.27 ± 0.03                     |
| PA trimer <sup>1</sup>        | 4.90 ± 0.47                     |
| PA tetramer <sup>1</sup>      | 0.05 ± 0.01                     |

**Abbreviations: PA (proanthocyanidin). The results are expressed on a wet basis as the mean ± SD (n=3). The results are expressed as mg of phenolic compound/g of GSPE. <sup>1</sup>Quantified using the calibration curve of proanthocyanidin B2. <sup>2</sup>Quantified using the calibration curve of epigallocatechin gallate.**
